# Supplementary material
Source: PubMed Central journal article supplement (PMC7301300)
Supplement: jamacardiol-e202028-s001.pdf [file jamacardiol-e202028-s001.pdf]

## Supplementary Online Content

Parizo JT, Kohsaka S, Sandhu AT, et al. Trends in readmission and mortality rates following heart failure hospitalization in the Veterans Affairs Health Care System from 2007 to 2017. *JAMA Cardiol*. Published online June 17, 2020. doi:10.1001/jamacardio.2020.2028

**eTable.** Additional baseline patient characteristics

This supplementary material has been provided by the authors to give readers additional information about their work.

**eTable. Additional baseline patient characteristics.**

| Total n =<br>304,374                                                                       | 2007-2008<br>(n=52,748) | 2009-2010<br>(n=56,767) | 2011-2012<br>(n=57,117) | 2013-2014<br>(n=59,684) | 2015-2017<br>(n=78,058) | p-value |
|--------------------------------------------------------------------------------------------|-------------------------|-------------------------|-------------------------|-------------------------|-------------------------|---------|
| <b>Index hospitalization at non-VA hospital</b>                                            | 6041<br>(11.5%)         | 7783<br>(13.7%)         | 8727<br>(15.3%)         | 10150<br>(17.0%)        | 12431<br>(15.9%)        | <0.001  |
| <b>Inpatient admit in prior year</b>                                                       | 33505<br>(63.5%)        | 36931<br>(65.1%)        | 37072<br>(64.9%)        | 38046<br>(63.8%)        | 48853<br>(62.6%)        | <0.001  |
| <b>Vitals<sup>a</sup></b>                                                                  |                         |                         |                         |                         |                         |         |
| Diastolic blood pressure, mean (SD), mmHg                                                  | 75.8 (14.4)             | 76.5 (14.0)             | 77.1 (13.7)             | 77.3 (13.4)             | 77.3 (13.0)             | <0.001  |
| Oxygen saturation, mean (SD), %                                                            | 95.2 (3.4)              | 95.4 (3.2)              | 95.4 (3.1)              | 95.4 (3.0)              | 95.3 (2.9)              | <0.001  |
| Temperature, mean (SD), degrees Fahrenheit                                                 | 97.6 (0.9)              | 97.6 (0.8)              | 97.7 (0.8)              | 97.8 (0.7)              | 97.8 (0.7)              | <0.001  |
| Height, mean (SD), inches                                                                  | 69.2 (3.2)              | 69.3 (3.2)              | 69.3 (3.2)              | 69.4 (3.1)              | 69.4 (3.1)              | <0.001  |
| <b>Comorbidities in last 2 years</b>                                                       |                         |                         |                         |                         |                         |         |
| COPD                                                                                       | 35048<br>(66.4%)        | 39331<br>(69.3%)        | 39432<br>(69.0%)        | 40904<br>(68.5%)        | 49740 (63.7)            | <0.001  |
| Depression                                                                                 | 18341<br>(34.8%)        | 22368<br>(39.4%)        | 23451<br>(41.1%)        | 25119<br>(42.1%)        | 32262<br>(41.3%)        | <0.001  |
| Psychiatric disease                                                                        | 4832 (9.2%)             | 5818<br>(10.3%)         | 5824<br>(10.2%)         | 5067 (8.5%)             | 5274 (6.8%)             | <0.001  |
| Alcohol use                                                                                | 8045<br>(15.3%)         | 9098<br>(16.0%)         | 9295<br>(16.3%)         | 9916<br>(16.6%)         | 13529<br>(17.3%)        | <0.001  |
| Valvular disorder                                                                          | 18170<br>(34.5%)        | 19905<br>(35.1%)        | 19379<br>(33.9%)        | 20130<br>(33.7%)        | 25207<br>(32.3%)        | 0.001   |
| <b>Medications in last 6 months</b>                                                        |                         |                         |                         |                         |                         |         |
| Insulin                                                                                    | 17540<br>(33.3%)        | 20072<br>(35.4%)        | 20455<br>(35.8%)        | 26380<br>(44.2%)        | 35229<br>(45.1%)        | <0.001  |
| <b>Hemoglobin in last 6 months, mean (SD), g/dL<sup>b</sup></b>                            | 12.09<br>(2.14)         | 12.0 (2.14)             | 11.97 (2.17)            | 11.95 (2.22)            | 11.95 (2.21)            | <0.001  |
| <b>Hemoglobin A1c in last 6 months, mean (SD), %<sup>b</sup></b>                           | 7.19 (3.39)             | 7.10 (1.59)             | 7.13 (1.63)             | 7.15 (1.66)             | 7.10 (1.68)             | <0.001  |
| <b>White blood cell count in last 6 months, mean (SD), K/<math>\mu</math>L<sup>b</sup></b> | 8.07 (3.81)             | 7.94 (3.58)             | 7.13 (3.64)             | 8.01 (3.66)             | 7.95 (3.51)             | <0.001  |

**eTable 1. Additional baseline patient characteristics (continued).**

| <b>Total n =<br/>304,374</b>                                     | <b>2007-2008<br/>(n=52,748)</b> | <b>2009-2010<br/>(n=56,767)</b> | <b>2011-2012<br/>(n=57,117)</b> | <b>2013-2014<br/>(n=59,684)</b> | <b>2015-2017<br/>(n=78,058)</b> | <b>p-value</b> |
|------------------------------------------------------------------|---------------------------------|---------------------------------|---------------------------------|---------------------------------|---------------------------------|----------------|
| <b>Sodium in last 6 months, mean (SD), mEq/mL<sup>b</sup></b>    | 138.0 (4.5)                     | 137.8 (4.5)                     | 137.9 (4.5)                     | 138.0 (4.4)                     | 138.2 (4.4)                     | <0.001         |
| <b>Creatinine in last 6 months, mean (SD), mg/dL<sup>b</sup></b> | 1.87 (1.42)                     | 1.84 (1.55)                     | 1.83 (1.43)                     | 1.80 (1.24)                     | 1.70 (1.13)                     | <0.001         |

All values represent the total and percentage of the study population, except where it is specified that the mean and standard deviation were used for continuous measures. P-values were determined by ANOVA for continuous variables and  $\chi^2$  test for categorical variables for homogeneity of baseline characteristics across the years of the study period. Missing covariate data were imputed using the most common category for categorical and the mean for continuous variables.

Abbreviations: COPD, Chronic obstructive pulmonary disease.

<sup>a</sup> The vital sign value from the inpatient admission that was obtained closest to the date of admission. Non-physiologic vital sign values were classified as missing.

<sup>b</sup> The laboratory value most recently recorded prior to or on the day of the index admission was utilized. Non-physiologic laboratory values were classified as missing, as well as white blood cell count > 50 K/ $\mu$ L to limit the impact of extreme observations.
